# Supplementary material for: Organizational Framework Conditions for Workplace Health Management in Different Settings of Nursing—A Cross-Sectional Analysis in Germany
Source: MDPI journal article supplement (doi:10.3390/ijerph19063693), 2022-03-20
Supplement: s1 [file s1]

Table S1: Detailed overview of the questionnaires and items used for the WHM-check

| Questionnaire                                                     | Items                                                                                                                                                     | Response option                                                                |
|-------------------------------------------------------------------|-----------------------------------------------------------------------------------------------------------------------------------------------------------|--------------------------------------------------------------------------------|
| <b>Health promoting willingness[28]</b><br>index over three items | In our company, the prevailing opinion is that health is exclusively a personal matter. <sup>1</sup>                                                      | Eleven-point Likert scale (from 0 = “do not agree at all”, 10 = “fully agree”) |
|                                                                   | In our company, the subject of employee health promotion is often discussed. <sup>1</sup>                                                                 |                                                                                |
|                                                                   | The company’s management demonstrates a very strong willingness to actively promote employee health. <sup>1</sup>                                         |                                                                                |
| <b>Health promoting management[28]</b><br>index over nine items   | Time resources, such as time off for employees, are made available for workplace health promotion on a large scale. <sup>2</sup>                          | Eleven-point Likert scale (from 0 = “do not agree at all”, 10 = “fully agree”) |
|                                                                   | Financial resources for workplace health promotion are provided on a large scale. <sup>2</sup>                                                            |                                                                                |
|                                                                   | Large amounts of personnel resources, e.g., through specially created jobs, are made available for workplace health promotion. <sup>2</sup>               |                                                                                |
|                                                                   | Needs are systematically identified prior to the implementation of worksite health promotion measures. <sup>1</sup>                                       |                                                                                |
|                                                                   | We define quantifiable goals for worksite health promotion. <sup>1</sup>                                                                                  |                                                                                |
|                                                                   | All worksite health promotion measures are constantly evaluated based on the defined goals. <sup>1</sup>                                                  |                                                                                |
|                                                                   | The worksite health promotion measures are modified based on evaluation results. <sup>1</sup>                                                             |                                                                                |
|                                                                   | All employees are informed about the projects in the area of workplace health promotion by suitable means of internal public relations work. <sup>2</sup> |                                                                                |
|                                                                   | Our company has a comprehensive health promotion program, in which individual measures are integrated. <sup>1</sup>                                       |                                                                                |

Now that you think about collaboration and cooperation in your facility, how strongly do you agree with the following statements?

...there is unity and agreement.

...how much do we trust each other.

... there is a ""we feeling"" among the employees.

... the working atmosphere is good.

...we get along poorly with each other.

...there is a great willingness to help each other.

...we share many values.

...there is a relationship of trust between the hierarchy levels.

...there is respect between the members of the different hierarchy levels. <sup>2</sup>

---

Our company offers a wide range of measures to change employees' health behavior (e.g. smoking prevention). <sup>2</sup>

Our company offers a wide range of preventive measures (e.g. on cancer). <sup>2</sup>

Our company improves the working conditions of employees through a variety of measures (e.g. measures to improve work organization). <sup>2</sup>

Our company offers a wide range of measures to promote and improve mental health (e.g. stress management measures). <sup>2</sup>

Our company offers a wide range of measures to promote the well-being of employees (e.g., appealing rooms, physiotherapeutic measures). <sup>2</sup>

---

Four-point Likert scale  
(1="do not agree at all",  
4="fully agree")

Eleven-point Likert scale (0 =  
"do not agree at all", 10 = "fully  
agree")

**Social capital[28]**  
index over nine items

**Workplace health  
activities [28]**  
index over six items

|                                                                                                 |                                                                                                                                                                                                                     |                                                             |
|-------------------------------------------------------------------------------------------------|---------------------------------------------------------------------------------------------------------------------------------------------------------------------------------------------------------------------|-------------------------------------------------------------|
|                                                                                                 | Our company offers a wide range of measures to help employees do their work full of energy (e.g. relaxation measures). <sup>2</sup>                                                                                 |                                                             |
|                                                                                                 | There is a steering committee or project group for workplace health promotion. <sup>2</sup>                                                                                                                         |                                                             |
| <b>Workplace health structures [28] and supporting cooperation partner</b><br>five items        | Workplace health promotion is part of the training and continuing education of managers. <sup>2</sup>                                                                                                               | Four nominal scaled response options ("yes" and "no")       |
|                                                                                                 | All employees have the opportunity to actively participate in the design and planning of workplace health promotion. <sup>2</sup>                                                                                   |                                                             |
|                                                                                                 | Workplace health promotion is the responsibility of the individual company units.[1] <sup>2</sup>                                                                                                                   |                                                             |
|                                                                                                 | We work together with cooperation partners (e.g. social insurance carriers) to promote WHP. <sup>2</sup>                                                                                                            |                                                             |
|                                                                                                 |                                                                                                                                                                                                                     | non-standardized question ("work with cooperation partner") |
|                                                                                                 | Our organization has a written concept (or a strategy paper, a guideline, a service agreement ...) for dealing professionally with violence and aggression. <sup>2</sup>                                            |                                                             |
|                                                                                                 | In our organization, the topic of "violence and aggression" is dealt with in an open, objective and constructive manner. <sup>2</sup>                                                                               |                                                             |
| <b>Handling of incidents of violence and aggression (against employees) [30]</b><br>eight items | Hazards due to incidents of violence and aggressive behavior are addressed in the risk assessment. <sup>2</sup>                                                                                                     | Nominal scaled response options ("yes" and "no")            |
|                                                                                                 | Violent and aggressive incidents are continuously documented in our organization (e.g., as accident reports, in the first-aid book, as file notes). <sup>2</sup>                                                    |                                                             |
|                                                                                                 | A regular evaluation of the documented violent assaults is carried out (e.g. according to the number of incidents per area, according to professional experience and gender of the persons concerned). <sup>2</sup> |                                                             |
|                                                                                                 | Conclusions that guide action are drawn from the regular evaluation of documented incidents of violence (e.g., revision of company emergency plans, training of managers). <sup>2</sup>                             |                                                             |

Our organization regularly offers specific training on violence-preventing behavior for employees (e.g., de-escalation training). <sup>2</sup>

There is a support concept for employees who have been exposed to a violent event. <sup>2</sup>

Are all employees aware of the possibility of an OIM? <sup>2</sup>

**Operational integration  
management [31]**  
four items

Is the answer, whether participation in the OIM or not, documented? <sup>2</sup>

Has it been clarified who can assume the function of an OIM representative? <sup>2</sup>

Nominal scaled response  
options (“yes” and “no”)

Is there a written schedule or a company agreement on the OIM? <sup>2</sup>

**Occupational safety**  
two items

Is there an occupational health and safety committee that meets regularly (e.g. as part of the WHM steering committee) or a person responsible for occupational health and safety management? <sup>2</sup>

non-standardized question Have the risk assessments required by the German Ordinance on Industrial Safety and Health (BSV) been carried out and documented with measures? <sup>2</sup>

Nominal scaled response  
options (“yes” and “no”)

<sup>1</sup> Translation from Jung et al., 2010 [27]

<sup>2</sup> Own translations. These do not constitute a validated English-language questionnaire and are for informational purposes only.

#### Reference

- [27] Jung, J., Nitzsche, A., Neumann, M., Wirtz, M., Kowalski, C., et al., “The Worksite Health Promotion Capacity Instrument (WHPCI): development, validation and approaches for determining companies' levels of health promotion capacity,” *BMC public health*, Vol. 10, 1 Jan. 2010, p. 550. doi: 10.1186/1471-2458-10-550.
- [28] Pfaff, H., Nitzsche, A., and Jung, J., *Handbuch zum „Healthy Organisational Resources and Strategies“*. (HORST) Fragebogen. Forschungsbericht 03-2008, 1 Jan. 2008.
- [30] Berufsgenossenschaft für Gesundheitsdienst und Wohlfahrtspflege, “Selbsteinschätzung „Gewalt und Aggression,” URL: [https://www.bgw-online.de/SharedDocs/Downloads/DE/Arbeitssicherheit\\_und\\_Gesundheitsschutz/Organisationsberatung/Selbsteinschaetzung\\_Download.pdf?\\_\\_blob=publicationFile](https://www.bgw-online.de/SharedDocs/Downloads/DE/Arbeitssicherheit_und_Gesundheitsschutz/Organisationsberatung/Selbsteinschaetzung_Download.pdf?__blob=publicationFile) [retrieved 14 December 2021].
- [31] Deutsche Rentenversicherung Baden-Württemberg, “Praxisleitfaden für kleine und mittelständische Unternehmen,” URL: [https://kom-consulting.de/pages/BEM\\_Broschuere\\_DRV-BW-2014.pdf](https://kom-consulting.de/pages/BEM_Broschuere_DRV-BW-2014.pdf) [retrieved 8 March 2021].
